# Supplementary material for: Detecting differential DNA methylation from sequencing of bisulfite converted DNA of diverse species
Source: PubMed Central journal article supplement — Brief Bioinform. 2017 Jul 21;20(1):33–46. doi: 10.1093/bib/bbx077 (PMC6357555; doi:10.1093/bib/bbx077), 2017-07-21

**Supplementary Table 1.** AUC result for BSmooth t-like statistic. Response is a binary variable that classifies CpGs based on whether their original fractional methylation differences between groups are over some criteria or not.

| Window size | Honey Bee  |           |           | Human      |           |           |
|-------------|------------|-----------|-----------|------------|-----------|-----------|
|             | Diff =0.05 | Diff =0.1 | Diff =0.2 | Diff =0.05 | Diff =0.1 | Diff =0.2 |
| 4000 bp     | 0.5774     | 0.6045    | 0.6739    | 0.5278     | 0.5451    | 0.5579    |
| 2000 bp     | 0.6203     | 0.6461    | 0.6706    | 0.5668     | 0.5828    | 0.6009    |
| 1000 bp     | 0.6706     | 0.7110    | 0.7443    | 0.5919     | 0.6113    | 0.6359    |
| 500 bp      | 0.7344     | 0.7686    | 0.7363    | 0.6194     | 0.6425    | 0.6732    |

**Supplementary Table 2.** Differentially methylated CpGs (DMLs) and DMRs between young and old human in the unfiltered and filtered data sets using RadMeth. Top 20 CpGs according to the q-values are shown. The numbers of CpGs that are significantly differentially methylated for q-value thresholds of 0.05, 0.10, and 0.20 are also shown.

| Rank     | Unfiltered dataset        |                     |            |                |       | Filtered dataset       |         |             |            |       |
|----------|---------------------------|---------------------|------------|----------------|-------|------------------------|---------|-------------|------------|-------|
|          | Location (scaffold:bp)    | Log-OR <sup>1</sup> | Original-p | Combined-p     | FDR q | Location (scaffold:bp) | Log-OR  | Original -p | Combined-p | FDR q |
| 1        | Chr1:3145020              | -2.75               | 0.016      | 0 <sup>2</sup> | 0     | Chr1:3145020           | -2.75   | 0.016       | 0          | 0     |
| 2        | Chr1:3145021              | -2.25               | 0.042      | 0              | 0     | Chr1:3145021           | -2.25   | 0.042       | 0          | 0     |
| 3        | Chr1:3145031              | -2.91               | 0.016      | 0              | 0     | Chr1:3145031           | -2.91   | 0.016       | 0          | 0     |
| 4        | Chr1:3145032              | -10.61              | 0.076      | 0              | 0     | Chr1:3145032           | -10.61  | 0.076       | 0          | 0     |
| 5        | Chr1:3145036              | -13.77              | 0.0064     | 0              | 0     | Chr1:3145036           | -13.77  | 0.0064      | 0          | 0     |
| 6        | Chr1:3145037              | -2.35               | 0.074      | 0              | 0     | Chr1:3145037           | -2.35   | 0.074       | 0          | 0     |
| 7        | Chr1:3145040              | -16.22              | 0.0052     | 0              | 0     | Chr1:3145040           | -16.22  | 0.0052      | 0          | 0     |
| 8        | Chr1:3145041              | -2.30               | 0.079      | 0              | 0     | Chr1:3145041           | -2.30   | 0.079       | 0          | 0     |
| 9        | Chr1:3145043              | -16.22              | 0.0052     | 0              | 0     | Chr1:3145043           | -16.22  | 0.0052      | 0          | 0     |
| 10       | Chr1:3145044              | -1.50               | 0.19       | 0              | 0     | Chr1:3145044           | -1.50   | 0.19        | 0          | 0     |
| 11       | Chr1:3145051              | -611.25             | 0.0056     | 0              | 0     | Chr1:3145051           | -611.25 | 0.0056      | 0          | 0     |
| 12       | Chr1:3145052              | -2.44               | 0.066      | 0              | 0     | Chr1:3145052           | -2.44   | 0.066       | 0          | 0     |
| 13       | Chr1:3145060              | -2.59               | 0.025      | 0              | 0     | Chr1:3145060           | -2.59   | 0.025       | 0          | 0     |
| 14       | Chr1:3145061              | -2.14               | 0.048      | 0              | 0     | Chr1:3145061           | -2.14   | 0.048       | 0          | 0     |
| 15       | Chr1:3145069              | -3.22               | 0.013      | 0              | 0     | Chr1:3145069           | -3.22   | 0.013       | 0          | 0     |
| 16       | Chr1:3145070              | -2.54               | 0.024      | 0              | 0     | Chr1:3145070           | -2.54   | 0.024       | 0          | 0     |
| 17       | Chr1:3145082              | -2.77               | 0.017      | 0              | 0     | Chr1:3145082           | -2.77   | 0.017       | 0          | 0     |
| 18       | Chr1:3145083              | -1.51               | 0.13       | 0              | 0     | Chr1:3145083           | -1.51   | 0.13        | 0          | 0     |
| 19       | Chr1:3145090              | -3.30               | 0.020      | 0              | 0     | Chr1:3145090           | -3.30   | 0.020       | 0          | 0     |
| 20       | Chr1:3145091              | -2.67               | 0.054      | 0              | 0     | Chr1:3145091           | -2.67   | 0.054       | 0          | 0     |
| q < 0.05 | 36532 (3641) <sup>3</sup> |                     |            |                |       | 56783 (5213)           |         |             |            |       |
| q < 0.10 | 54112 (6621)              |                     |            |                |       | 86984 (10206)          |         |             |            |       |
| q < 0.20 | 91936 (13722)             |                     |            |                |       | 153583 (22314)         |         |             |            |       |

<sup>1</sup>Odds Ratio of cytosine reads between forager and nurse groups.

<sup>2</sup>Too low value to approximate accurately

<sup>3</sup>Numbers in parenthesis indicate the number of significant DMRs.

**Supplementary Table 3.** Differentially methylated CpG clusters (DMRs) between old and young human brains in the unfiltered and filtered data sets using Biseq. Top 20 CpG clusters according to the q-values are shown. We used only chromosome 22 for the analysis.

| Rank | Unfiltered dataset (N*=14123) |                        |           |        | Filtered dataset (N=14076) |                        |           |        |
|------|-------------------------------|------------------------|-----------|--------|----------------------------|------------------------|-----------|--------|
|      | Location (start-end)          | Methylation Difference | Cluster-p | FDR q  | Location (start-end)       | Methylation Difference | Cluster-p | FDR q  |
| 1    | 37466162-37466165             | 0.403                  | 0.34      | 0.9995 | 27737516-27737516          | 0.370                  | 0.37      | 0.9993 |
| 2    | 34107586-34107586             | 0.208                  | 0.37      | 0.9995 | 36127525-36127526          | 0.519                  | 0.38      | 0.9993 |
| 3    | 27737516-27737516             | 0.370                  | 0.37      | 0.9995 | 36678490-36678490          | 0.250                  | 0.38      | 0.9993 |
| 4    | 47442538-47442538             | 0.400                  | 0.38      | 0.9995 | 27770812-27770815          | 0.450                  | 0.38      | 0.9993 |
| 5    | 20266875-20266875             | 0.426                  | 0.38      | 0.9995 | 45847882-45847883          | 0.516                  | 0.39      | 0.9993 |
| 6    | 45703964-45703964             | 0.281                  | 0.38      | 0.9995 | 42841885-42841923          | 0.300                  | 0.39      | 0.9993 |
| 7    | 27770812-27770815             | 0.450                  | 0.38      | 0.9995 | 34065152-34065152          | 0.333                  | 0.39      | 0.9993 |
| 8    | 47411541-47411542             | 0.416                  | 0.38      | 0.9995 | 36390794-36390794          | 0.667                  | 0.39      | 0.9993 |
| 9    | 32232349-32232350             | 0.349                  | 0.38      | 0.9995 | 40239507-40239508          | 0.536                  | 0.39      | 0.9993 |
| 10   | 47448253-47448253             | 0.357                  | 0.39      | 0.9995 | 41911670-41911686          | 0.350                  | 0.39      | 0.9993 |
| 11   | 36994805-36994812             | 0.560                  | 0.39      | 0.9995 | 18494163-18494164          | 0.533                  | 0.39      | 0.9993 |
| 12   | 34065152-34065152             | 0.333                  | 0.39      | 0.9995 | 42463792-42463792          | 0.833                  | 0.39      | 0.9993 |
| 13   | 29819309-29819342             | 0.153                  | 0.39      | 0.9995 | 37466224-37466229          | 0.327                  | 0.39      | 0.9993 |
| 14   | 43002916-43002974             | 0.350                  | 0.39      | 0.9995 | 29037408-29037409          | 0.409                  | 0.40      | 0.9993 |
| 15   | 36390794-36390794             | 0.667                  | 0.39      | 0.9995 | 36594467-36594467          | 0.000                  | 0.40      | 0.9993 |
| 16   | 28754998-28754998             | 0.331                  | 0.39      | 0.9995 | 24630479-24630517          | 0.302                  | 0.40      | 0.9993 |
| 17   | 16430527-16430531             | 0.342                  | 0.39      | 0.9995 | 18633058-18633059          | 0.500                  | 0.40      | 0.9993 |
| 18   | 21909909-21909949             | 0.387                  | 0.39      | 0.9995 | 21909518-21909518          | 0.204                  | 0.40      | 0.9993 |
| 19   | 21893127-21893170             | 0.267                  | 0.39      | 0.9995 | 31348589-31348590          | 0.145                  | 0.40      | 0.9993 |
| 20   | 42034617-42034643             | 0.388                  | 0.39      | 0.9995 | 27737516-27737516          | 0.370                  | 0.40      | 0.9993 |

\* Number of tested clusters in chromosome 22.

**Supplementary Table 4.** AUC result for HMM-Fisher statistic. Response is a binary variable that classifies CpGs based on whether their original fractional methylation differences between groups are over some criteria or not. We used p-value of each CpG from HMM-Fisher tool as a predictor.

| Number of Classes | Honey bee  |           |           | Human      |           |           |
|-------------------|------------|-----------|-----------|------------|-----------|-----------|
|                   | Diff =0.05 | Diff =0.1 | Diff =0.2 | Diff =0.05 | Diff =0.1 | Diff =0.2 |
| Two               | 0.5473     | 0.618     | 0.6935    | 0.5562     | 0.573     | 0.6115    |
| Three             | 0.5658     | 0.6557    | 0.7401    | 0.6145     | 0.6477    | 0.7106    |

**Supplementary Table 5.** Summary of two alignment results to chromosome 22 of the human dataset. We summarized the number of CpGs, mean and standard deviation of read coverage, mean fractional methylation level, proportion of highly, or non-methylated CpGs, and correlation of fractional methylation level between the two alignments. Overall, they have similar values and patterns.

| Sample ID  |        | Number of CpGs | Mean and standard deviation of coverage | Mean fractional methylation | Proportion of Highly methylated CpGs | Proportion of non-methylated CpGs | Correlation of fractional methylation |
|------------|--------|----------------|-----------------------------------------|-----------------------------|--------------------------------------|-----------------------------------|---------------------------------------|
| GSM1167005 | Bowtie | 1054909        | 7.97±4.54                               | 0.7768                      | 0.7479                               | 0.100                             | 0.799                                 |
|            | BSMAP  | 1074201        | 7.43±5.69                               | 0.7738                      | 0.7367                               | 0.099                             |                                       |
| GSM1166274 | Bowtie | 1052604        | 7.70±4.48                               | 0.7779                      | 0.7487                               | 0.102                             | 0.731                                 |
|            | BSMAP  | 997348         | 4.18±3.85                               | 0.7850                      | 0.7298                               | 0.111                             |                                       |
| GSM1173775 | Bowtie | 767852         | 2.16±1.45                               | 0.7824                      | 0.7362                               | 0.162                             | 0.605                                 |
|            | BSMAP  | 756774         | 2.29±2.44                               | 0.7767                      | 0.7260                               | 0.160                             |                                       |
| GSM1173772 | Bowtie | 1044444        | 6.45±4.07                               | 0.7639                      | 0.7253                               | 0.110                             | 0.712                                 |
|            | BSMAP  | 1066613        | 7.07±6.67                               | 0.7205                      | 0.6519                               | 0.113                             |                                       |

**Supplementary Table 6.** In line with our second recommendation, we counted globally unmethylated CpG sites used for filtering. In the last column, we calculated the proportion of removed CpGs that are globally unmethylated. This proportion is similar in both alignments.

|        | Number of CpGs in filtered dataset. | Number of CpGs in un-filtered dataset. | Proportion of removed CpGs |
|--------|-------------------------------------|----------------------------------------|----------------------------|
| Bowtie | 980120                              | 1069498                                | 0.084                      |
| BSMAP  | 984156                              | 1069267                                | 0.080                      |

**Supplementary Table 7.** The classification results using HMM-Fisher tool in chromosome 22 using the two aligners. The classified proportions and number of DMLs are similar and do not contradict our conclusion.

|                   |       | Proportion of Methylation state |         |        | Classification results<br>(number of DMLs) |             |
|-------------------|-------|---------------------------------|---------|--------|--------------------------------------------|-------------|
|                   |       | Un                              | Partial | Full   | Two class                                  | Three class |
| Human<br>(Bowtie) | Young | 0.1171                          | 0.1287  | 0.7542 | 2082                                       | 7049        |
|                   | Old   | 0.1452                          | 0.1131  | 0.7417 |                                            |             |
| Human<br>(BSMAP)  | Young | 0.1155                          | 0.1411  | 0.7434 | 1415                                       | 5516        |
|                   | Old   | 0.1440                          | 0.1627  | 0.6933 |                                            |             |



**Supplementary Figure 1.** Comparison of smoothing patterns in our human dataset using two aligners. (A) Bowtie and (B) BSMAP. They show very similar patterns of smoothing and correlation coefficients between estimated and original fractional methylation levels.

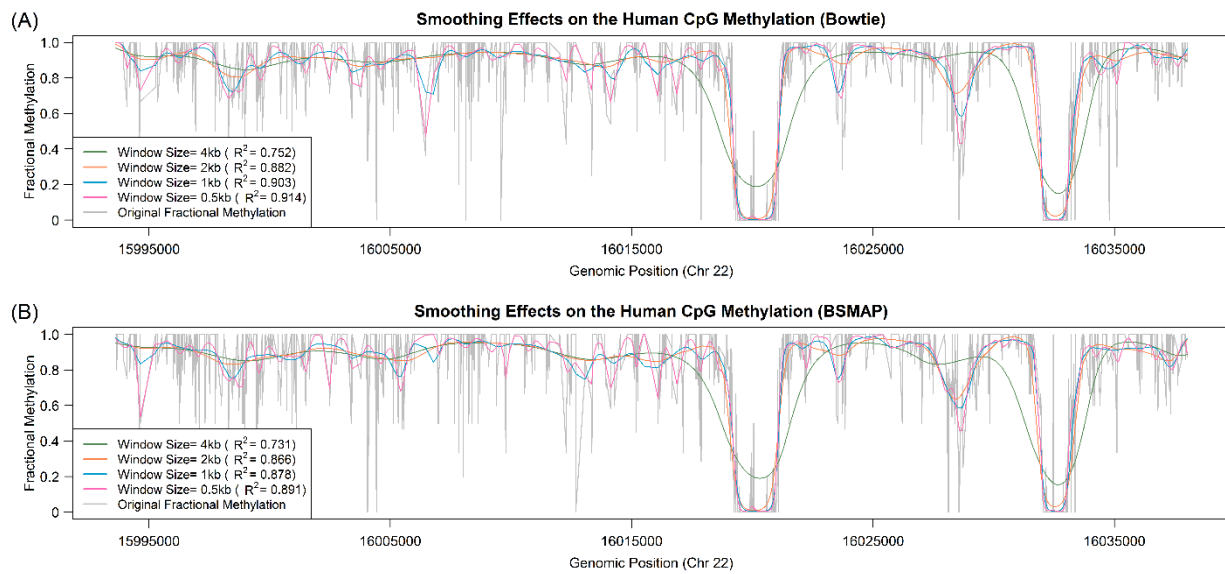

**Supplementary Figure 2.** Plot of relative ratios between numbers of the DMLs from the 4000bp window size and those from the other window sizes. We used BSmooth to detect DMLs for each window size. The gold line shows the trend from the Bowtie aligned data and the green line is from the BSMAP aligned data. They show similar patterns in variation, that do not increase much over varying window sizes.

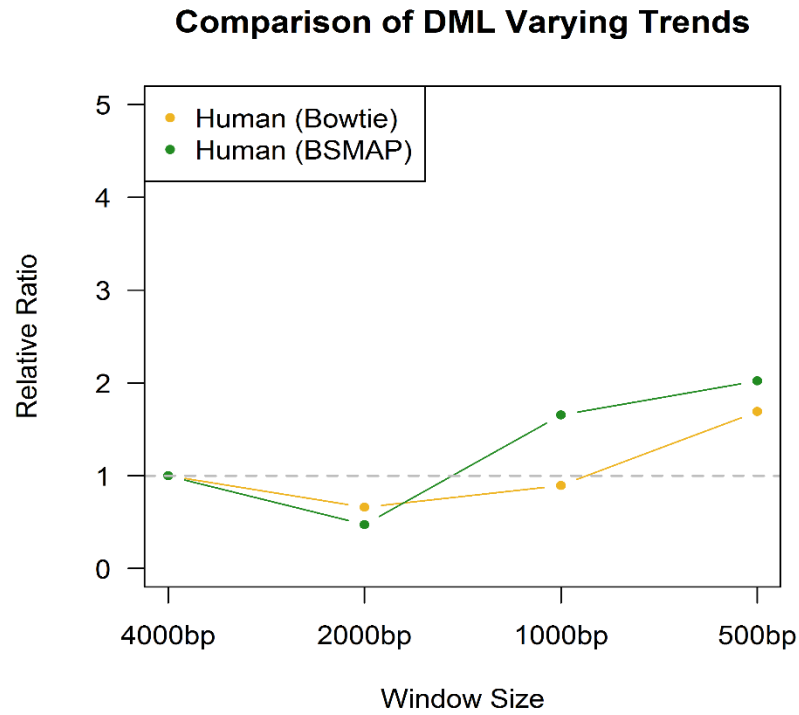

**Supplementary Figure 3.** Histogram of the distribution of fractional methylation in chromosome 22. Gold bars represent the distribution of methylation levels aligned using Bowtie while green bars represent the distribution of methylation levels aligned with BSMAP. They show very similar patterns and high correlation coefficient.

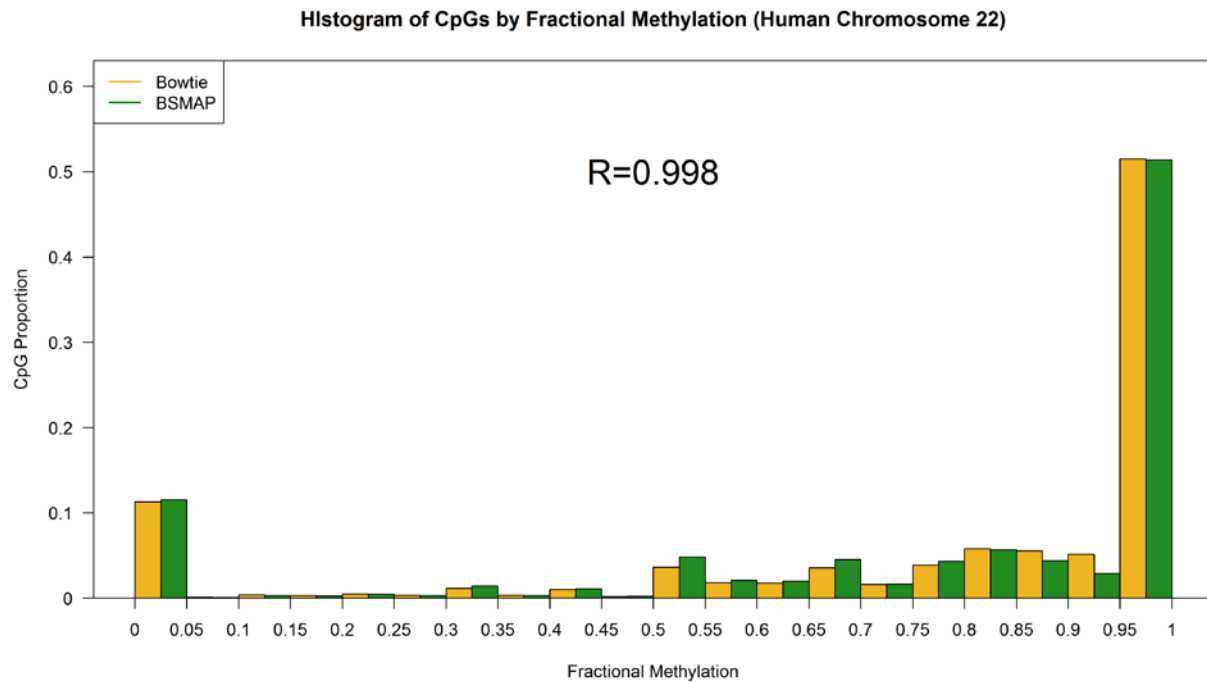

Supplement: bbx077_supp.pdf [file bbx077_supp.pdf]
